# Supplementary material
Source: Springer Nature journal article supplement (https://www.springermedizin.de/resource/supplementary/12891_2006_255_MOESM1_ESM.pdf/9510868)
Supplement: MOESM1 [file 9510868]

Office staff invited to enter the study

Ineligible participants excluded

Participants recruited: establishment of study cohort

Baseline measures of potential risk factors

Fortnightly follow-up of neck symptoms  
for 12 months

Analysis of risk factors and estimation of incidence  
proportion
